# Supplementary material for: Cells activated for wound repair have the potential to direct collective invasion of an epithelium
Source: PubMed Central journal article supplement — Mol Biol Cell. 2016 Feb 1;27(3):451–65. doi: 10.1091/mbc.E15-09-0615 (PMC4751597; doi:10.1091/mbc.e15-09-0615), 2016-02-01
Supplement: supp_E15-09-0615v1_CombinedSupMats.pdf [file supp_E15-09-0615v1_CombinedSupMats.pdf]

# Supplemental Materials

*Molecular Biology of the Cell*

Bleaken et al.
